# Supplementary material for: Unraveling the genetic evolution of SARS-CoV-2 Recombinants using mutational dynamics across the different lineages
Source: Front Med (Lausanne). 2024 Jan 15;10:1294699. doi: 10.3389/fmed.2023.1294699 (PMC10823376; doi:10.3389/fmed.2023.1294699)
Supplement: Supplementary file 3 [file Table_3.XLSX]

## Sheet: PreVOC
Supplementary_Table-3:Haplo-blocks of PreVOC to Recombinant (Discovery_Data)
Haplotype	Start	End	length	total mut	Mutations	AA	Lineage_Category	Lineage_Freq	overall_category
block-1	15714	17410	1696	4	C15714T	ORF1ab:p.5150L	low	1.0989	spontaneously increasing
avg-0.23					T16342C	ORF1ab:p.5360S>P	low	1.0989	spontaneously increasing
					C16466T	ORF1ab:p.5401P>L	low	1.4652	spontaneously vanishing
					C17410T	ORF1ab:p.5716R>C	low	0.732601	spontaneously increasing
block-2	23055	23075	20	3	A23055G	S:p.498Q>R	low	4.3956	dynamically decreasing
avg-0.66					A23063T	S:p.501N>Y	low	5.49451	dynamically increasing
					T23075C	S:p.505Y>H	low	5.49451	spontaneously increasing
block-3	23854	25584	1730	8	C23854A	S:p.764N>K	medium	14.2857	spontaneously increasing
avg-0.57					G23948T	S:p.796D>Y	medium	16.8498	spontaneously increasing
					A24424T	S:p.954Q>H	medium	19.0476	spontaneously increasing
					T24469A	S:p.969N>K	medium	27.8388	spontaneously increasing
					C24503T	S:p.981L>F	low	1.0989	spontaneously vanishing
					C25000T	S:p.1146D	low	5.49451	spontaneously increasing
					C25469T	ORF3a:p.26S>L	low	10.2564	dynamically vanishing
					C25584T	ORF3a:p.64T	medium	16.8498	spontaneously increasing
block-4	26270	27384	1114	9	C26270T	E:p.9T>I	low	5.49451	spontaneously increasing
avg-0.53					C26577G	M:p.19Q>E	low	5.49451	spontaneously increasing
					G26709A	M:p.63A>T	medium	13.5531	spontaneously increasing
					T26767C	M:p.82I>T	medium	11.3553	spontaneously vanishing
					C26858T	M:p.112F	low	0.732601	spontaneously increasing
					A27259C	ORF6:p.20R	medium	17.2161	dynamically increasing
					G27382C	ORF6:p.61D>H	low	0.732601	dynamically decreasing
					A27383T	ORF6:p.61D>V	low	0.732601	dynamically decreasing
					T27384C	ORF6:p.61D	low	0.732601	dynamically decreasing
block-5	28881	28883	2	3	G28881T	N:p.203R>M	medium	29.304	dynamically decreasing
avg-0.82					G28882A	N:p.203R	medium	35.8974	spontaneously increasing
					G28883C	N:p.204G>R	medium	36.9963	spontaneously increasing
**Unique represents the mutation unique to that particular lineage

## Sheet: Alpha
Haplotype	start	end	length	total mut	Mutations	AA	Lineage_Category	Lineage_Freq	overall_category
block-1	27972	28111	139	4	C27972T	ORF8:p.27Q>*	high	90	dynamically vanishing
avg-0.54					G28048T	ORF8:p.52R>I	high	90	spontaneously vanishing
					A28095T	ORF8:p.68K>*	medium	43.3333	Unique
					A28111G	ORF8:p.73Y>C	high	100	Unique
block-2	28280	28282	3	3	G28280C	N:p.3D>H	high	93.3333	Unique
avg-1					A28281T	N:p.3D>V	high	93.3333	Unique
					T28282A	N:p.3D>E	high	93.3333	Unique
block-3	28881	28977	96	4	G28881A	N:p.203R>K	high	93.3333	spontaneously increasing
avg-1					G28882A	N:p.203R	high	93.3333	spontaneously increasing
					G28883C	N:p.204G>R	high	93.3333	spontaneously increasing
					C28977T	N:p.235S>F	high	93.3333	spontanesouly vanishing

## Sheet: Beta
Haplotype	start	end	length	total mut	Mutations	AA	Lineage_Category	Lineage_Freq	overall_category
block-1	8599	11083	2484	5	T8599C	ORF1ab:p.2778L	medium	12.2449	spontanesouly vanishing
avg-0.21					C9943T	ORF1ab:p.3226Y	medium	16.3265	dynamically vanishing
					C10039T	ORF1ab:p.3258T	low	8.16327	Unique
					A10323G	ORF1ab:p.3353K>R	low	8.16327	Unique
					G11083T	ORF1ab:p.3606L>F	medium	20.4082	dynamically vanishing
block-2	12312	21714	9402	8	C12312T	ORF1ab:p.4016A>V	medium	18.3673	dynamically vanishing
avg-0.44					C12676T	ORF1ab:p.4137V	medium	14.2857	dynamically vanishing
					T17115C	ORF1ab:p.5617I	medium	16.3265	dynamically vanishing
					A18093G	ORF1ab:p.5943L	medium	14.2857	spontanesouly vanishing
					C18877T	ORF1ab:p.6205L	high	89.7959	dynamically vanishing
					G19101T	ORF1ab:p.6279Q>H	low	4.08163	Unique
					G20670T	ORF1ab:p.6802A	medium	14.2857	spontanesouly vanishing
					C21714T	S:p.51T>I	medium	14.2857	dynamically vanishing
block-3	29335	29545	210	3	T29335C	N:p.354N	low	4.08163	Unique
avg-0.57					G29402T	N:p.377D>Y	low	10.2041	dynamically vanishing
					C29545T	-	low	8.16327	Unique

## Sheet: Delta
Haplotype	start	end	length	total mut	Mutations	AA	Lineage_Category	Lineage_Freq	overall_category
block-1	1191	12964	11773	16	C1191T	ORF1ab:p.309P>L	medium	18.6441	dynamically vanishing
avg-0.27					C1267T	ORF1ab:p.334G	medium	19.4915	Unique
					G4181T	ORF1ab:p.1306A>S	medium	20.7627	dynamically vanishing
					C5184T	ORF1ab:p.1640P>L	medium	39.8305	spontaneously vanishing
					C6402T	ORF1ab:p.2046P>L	medium	22.4576	Unique
					C6539T	ORF1ab:p.2092H>Y	medium	13.5593	Unique
					C7124T	ORF1ab:p.2287P>S	medium	30.9322	dynamically vanishing
					C8986T	ORF1ab:p.2907D	medium	28.3898	spontanesouly vanishing
					G9053T	ORF1ab:p.2930V>L	medium	29.2373	Unique
					C9891T	ORF1ab:p.3209A>V	medium	37.7119	spontaneously vanishing
					C10029T	ORF1ab:p.3255T>I	medium	33.8983	spontaneously increasing
					A11201G	ORF1ab:p.3646T>A	medium	38.9831	spontaneously vanishing
					A11332G	ORF1ab:p.3689V	medium	19.9153	Unique
					T11418C	ORF1ab:p.3718V>A	medium	45.339	dynamically vanishing
					C11514T	ORF1ab:p.3750T>I	medium	11.8644	Unique
					T12946C	ORF1ab:p.4227Y	medium	19.0678	Unique

## Sheet: BA1
Haplotype	start	end	length	total mut	Mutations	AA	Lineage_Category	Lineage_Freq	overall_category
block-1	22673	22688	15	4	T22673C	S:p.371S>P	medium	28.1967	Unique
avg-0.66					C22674T	S:p.371S>F	medium	41.9672	spontaneously decreasing
					T22679C	S:p.373S>P	medium	44.7541	spontaneously decreasing
					C22686T	S:p.375S>F	medium	41.4754	spontaneously decreasing
block-2	22992	23013	21	3	G22992A	S:p.477S>N	high	53.4426	dynamically decreasing
avg-0.72					C22995A	S:p.478T>K	high	56.2295	spontaneously increasing
					A23013C	S:p.484E>A	medium	47.2131	dynamically decreasing
block-3	23040	23075	35	5	A23040G	S:p.493Q>R	medium	37.2131	spontaneously increasing
avg-0.69					G23048A	S:p.496G>S	medium	34.918	Unique
					A23055G	S:p.498Q>R	medium	37.0492	dynamically decreasing
					A23063T	S:p.501N>Y	medium	45.9016	dynamically increasing
					T23075C	S:p.505Y>H	high	51.3115	spontaneously increasing
block-4	24424	24503	79	3	A24424T	S:p.954Q>H	high	94.2623	spontaneously increasing
avg-0.62					T24469A	S:p.969N>K	high	94.0984	spontaneously increasing
					C24503T	S:p.981L>F	high	91.1475	spontaneously vanishing

## Sheet: BA2
Haplotype	start	end	length	total mut	Mutations	AA	Lineage_Category	Lineage_Freq	overall_category
block-1	23055	23075	20	3	A23055G	S:p.498Q>R	high	79.4872	dynamically decreasing
avg-0.65					A23063T	S:p.501N>Y	high	82.7839	dynamically increasing
					T23075C	S:p.505Y>H	high	85.4701	spontaneously increasing
block-2	27382	27384	2	3	G27382C	ORF6:p.61D>H	high	90.8425	dynamically decreasing
avg-0.86					A27383T	ORF6:p.61D>V	high	90.3541	dynamically decreasing
					T27384C	ORF6:p.61D	high	91.2088	dynamically decreasing

## Sheet: Recombinant
Haplotype	start	end	length	total mut	Mutations	AA	Lineage_Category	Lineage_Freq	overall_category
block-1	22992	23013	21	3	G22992A	S:p.477S>N	medium	36.2069	dynamically decreasing
avg-0.6					C22995A	S:p.478T>K	high	53.4483	spontaneously increasing
					A23013C	S:p.484E>A	medium	34.4828	dynamically decreasing
block-2	27382	27384	2	3	G27382C	ORF6:p.61D>H	low	5.17241	dynamically decreasing
avg-1					A27383T	ORF6:p.61D>V	low	5.17241	dynamically decreasing
					T27384C	ORF6:p.61D	low	5.17241	dynamically decreasing
block-3	28881	28883	2	3	G28881T	N:p.203R>M	low	5.17241	dynamically decreasing
avg-0.64					G28882A	N:p.203R	high	82.7586	spontaneously increasing
					G28883C	N:p.204G>R	high	82.7586	spontaneously increasing
